# Supplementary material for: Large in-plane anisotropic 2D perovskites toward highly linear polarized light responses
Source: Royal Society of Chemistry journal article supplement (doi:10.1039/d3qi01116j), 2023-01-01
Supplement: d3qi01116j1.pdf [file d3qi01116j1.pdf]

## Supporting information

### **Large In-Plane Anisotropic 2D Perovskite Toward High Linearly Polarized Light Response**

*Bei-Dou Liang, Chang-Chun Fan, Cheng-Dong Liu, Tong-Yu Ju, Chao-Yang  
Chai,\* Xiang-Bin Han\*, and Wen Zhang\**

School of Chemistry and Chemical Engineering, Southeast University, Nanjing  
211189, China.

**Synthesis.** All the analytical grade chemicals were used as received without further purification. Stoichiometric amounts of lead iodide (5 mmol, 2.31 g) and *Rac/R/S*-piperidine-3-carboxylic acid (10 mmol, 1.29 g) were dissolved in a concentrated aqueous HI solution. A clear solution was obtained after continuous stirring for 1 hour at 353 K. Plate crystal crystals were obtained by slowly cooling (1.5 K/day) the above solution to room temperature.

**General characterizations.** Room temperature X-ray diffraction data were collected on a Rigaku SmartLab X-ray diffractometer. The diffraction patterns were obtained in the  $2\theta$  range of 5–50° with a step size of 0.02°. Ultraviolet-vis (UV-vis) absorption spectra were performed with Shimadzu UV-2600 equipping ISR-2600Plus integrating sphere.

**I-V measurement.** I-V measurement was conducted using a PDA FS380 Source meter. The light intensity was quantified by a photodetector (PM100A, Thorlabs).

**Device fabrication.** The crystal used to assemble the polarization photodetector device was measured as 3×4×1 mm<sup>3</sup>. Electrodes were prepared on the (100) surface of the single crystal along the c-axis. The effective area of the photodetector device was determined to be 0.4 mm<sup>2</sup> using a high-definition digital camera.

**DFT calculation.** VASP code was used to conduct DFT calculations. The projector augmented wave method and the Perdew–Burke–Ernzerhof (PBE) functional within the generalized gradient approximation were used to define the ion-electron interactions and the exchange-correlation interactions, respectively. Van der Waals interactions were assessed by employing Grimme's dispersion-corrected semi-empirical DFT-D3 method<sup>[1]</sup>. The cutoff of energy was set to 500 eV and a 4×4×2 Gamma centered grid of k-points was used. VASPKIT was used to perform Post-processing analysis<sup>[2]</sup>.

**Single-crystal X-ray Diffraction.** Crystallographic data of the **1*Rac*/1*R*/1*S*** were collected on a Rigaku Oxford Diffraction Supernova Dual Source, Cu at Zero equipped with an AtlasS2 CCD using Mo K $\alpha$  radiation and an XtaLAB

Synergy R, DW system, HyPix diffractometer. Rigaku CrysAlisPro software was used to collect data, refine cells, and reduce data. SHELXL-2018 in the OLEX2 interface was used to solve the single crystal structures by direct methods<sup>[3]</sup>. All non-hydrogen atoms were refined anisotropically. Hydrogen atoms were generated geometrically. The X-ray crystallographic data of **1*Rac*/1*R*/1*S*** were deposited at the Cambridge Crystallographic Data Centre (CCDC), under deposition numbers CCDC 2265467-2265469. These data can be obtained free of charge via <http://www.ccdc.cam.ac.uk/conts/retrieving.html> (or from the Cambridge Crystallographic Data Centre, 12, Union Road, Cambridge CB2 1EZ, UK; fax: +44 1223 336033).

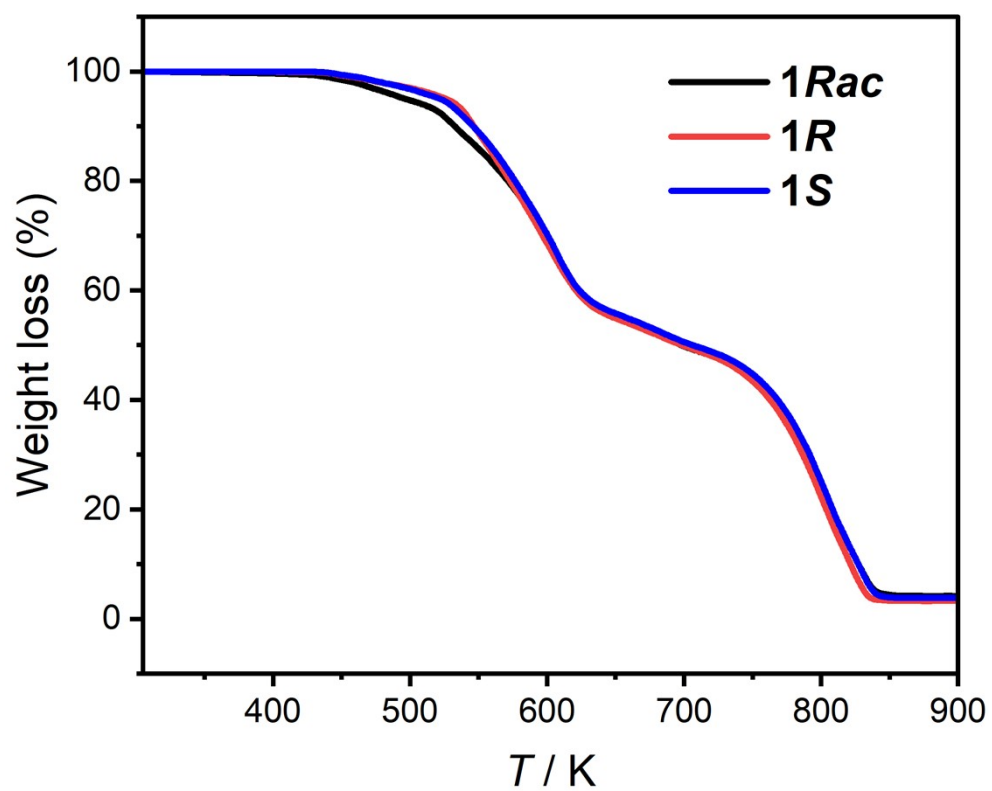

**Fig. S1** TGA measurement of **1Rac/1R/1S**.

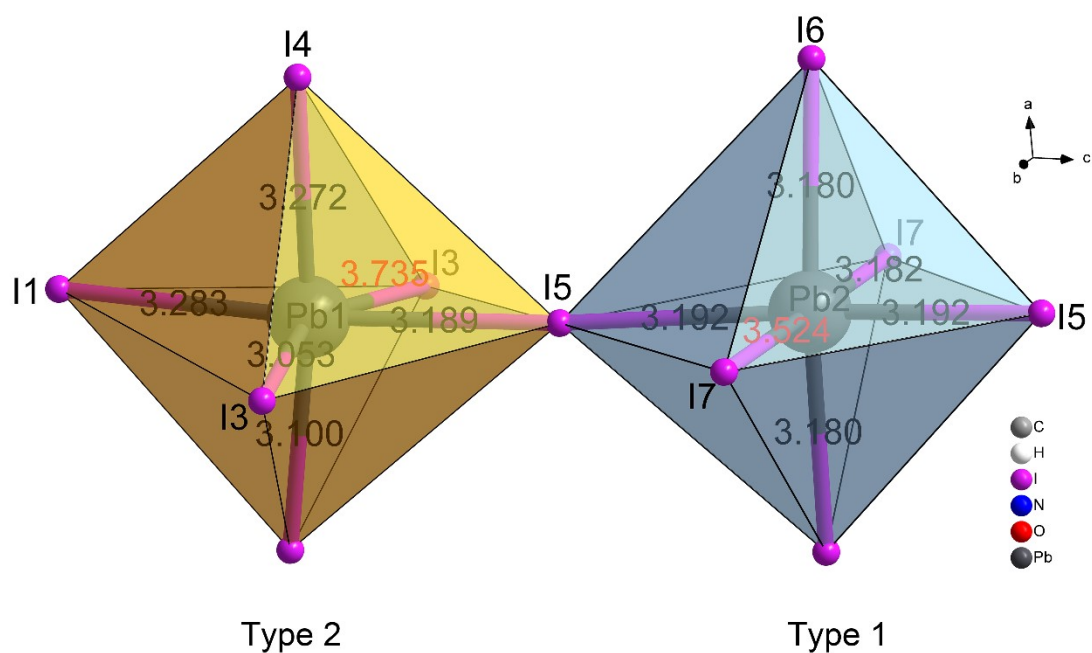

**Fig. S2** Two types of  $[PbI_6]^{4-}$  octahedrons showing different degrees of distortion in **1R**.

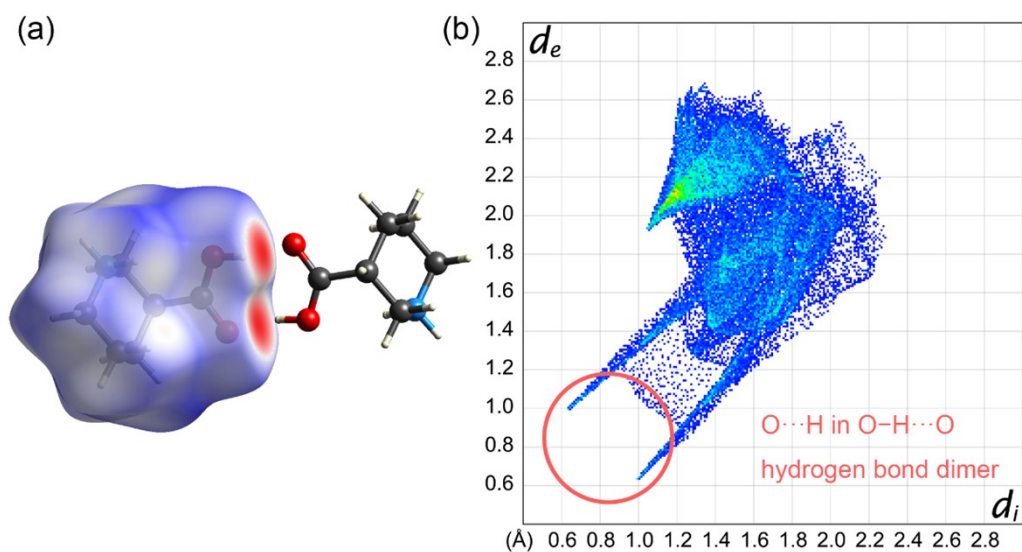

**Fig. S3** Hirshfeld surfaces and 2D fingerprint plots for cations in dimer O...H-O hydrogen bond of **1Rac**.

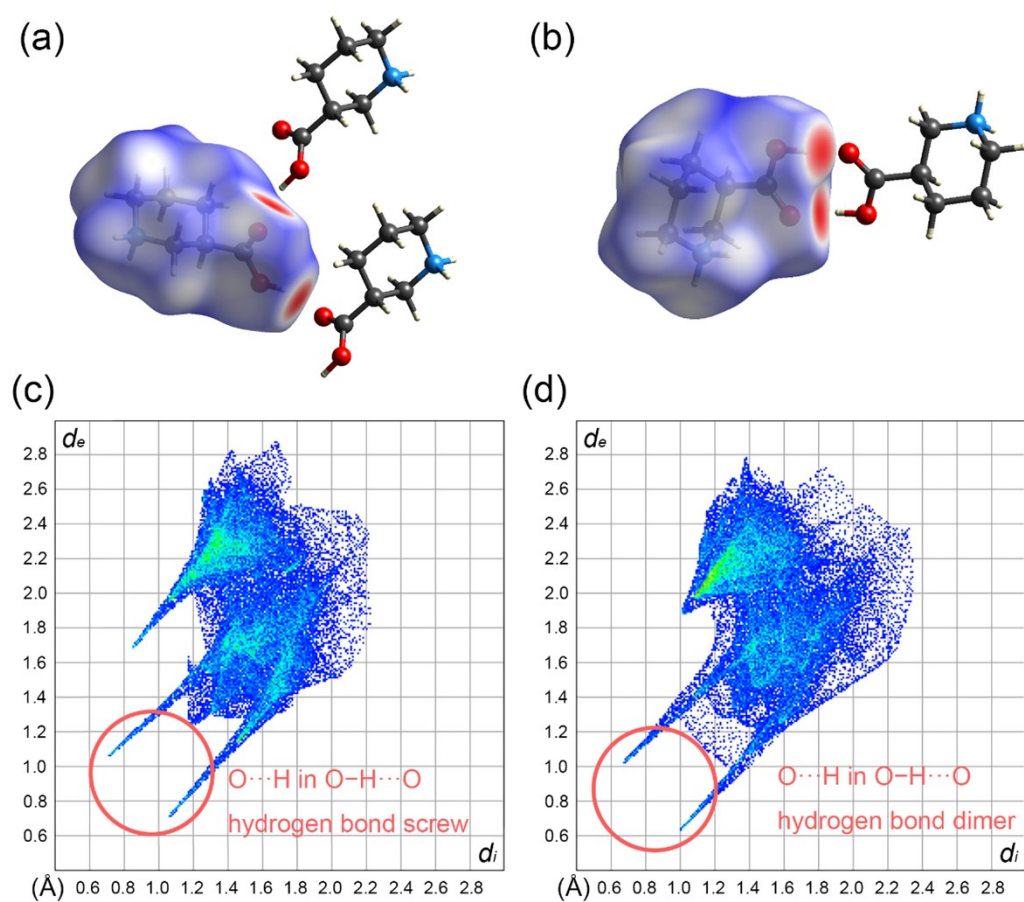

**Fig. S4** Hirshfeld surfaces and fingerprint plots for cations in dimer and helical chain O...H-O hydrogen bond of **1R**, respectively.

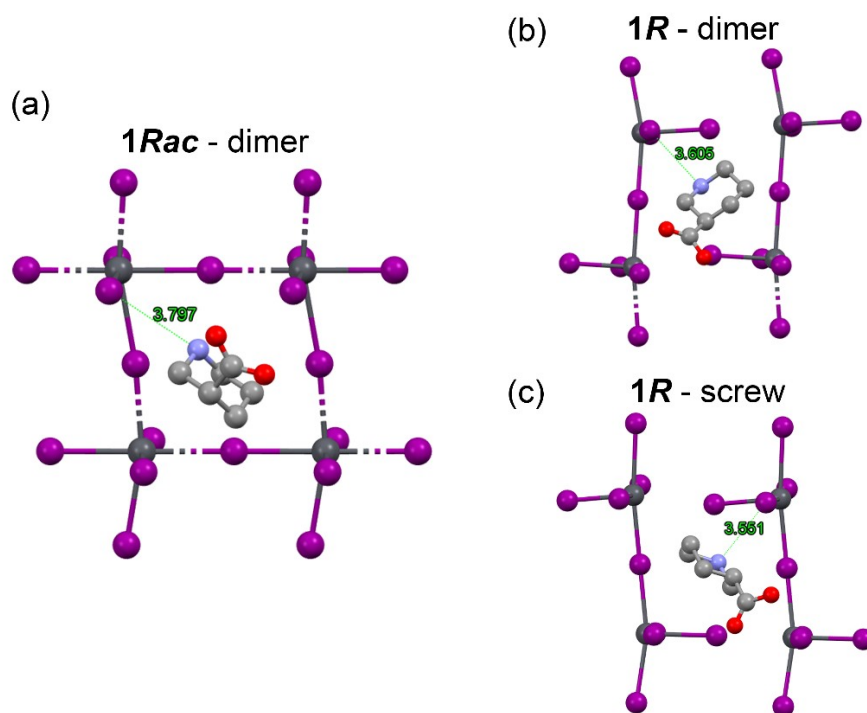

**Fig. S5** (a) Shortest N...I distance in the crystal structure of **1Rac** and (b, c) **1R**.

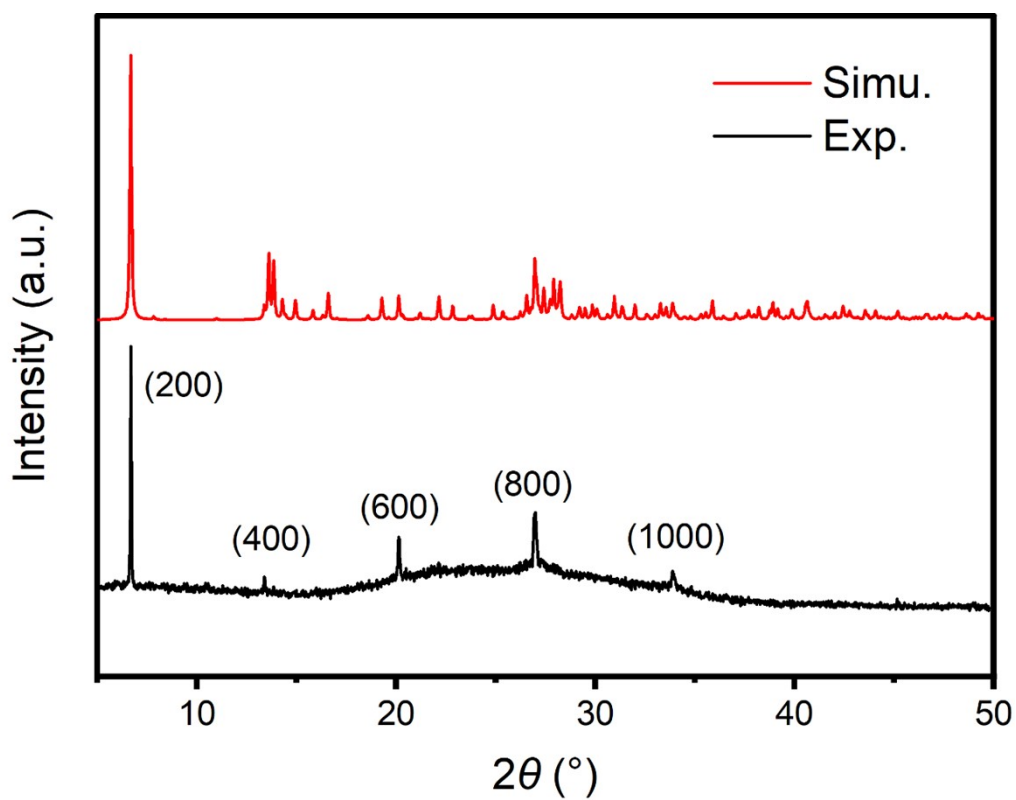

**Fig. S6** Single crystal orientation for **1R**.

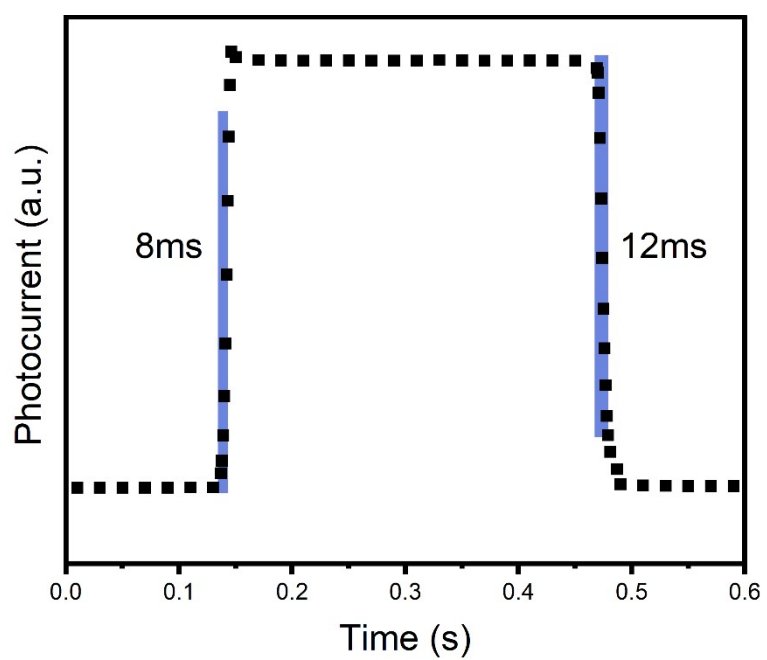

**Fig. S7** Response time for **1R** under 405 nm polarized light irradiation.

**Table S1** Crystallographic data and structural refinement details for **1Rac/1R/1S**.

|                                                                                                               | <b>1Rac</b>                                                                     | <b>1R</b>                                                                                      | <b>1S</b>                                                                                      |
|---------------------------------------------------------------------------------------------------------------|---------------------------------------------------------------------------------|------------------------------------------------------------------------------------------------|------------------------------------------------------------------------------------------------|
| Formula                                                                                                       | C <sub>12</sub> H <sub>24</sub> I <sub>4</sub> N <sub>2</sub> O <sub>4</sub> Pb | C <sub>36</sub> H <sub>72</sub> I <sub>12</sub> N <sub>6</sub> O <sub>12</sub> Pb <sub>3</sub> | C <sub>36</sub> H <sub>72</sub> I <sub>12</sub> N <sub>6</sub> O <sub>12</sub> Pb <sub>3</sub> |
| Formula weight                                                                                                | 975.12                                                                          | 2925.36                                                                                        | 2925.36                                                                                        |
| Crystal system                                                                                                | orthorhombic                                                                    | Monoclinic                                                                                     | Monoclinic                                                                                     |
| space group                                                                                                   | <i>Pnma</i>                                                                     | <i>C2</i>                                                                                      | <i>C2</i>                                                                                      |
| <i>a</i> / Å                                                                                                  | 13.0681(6)                                                                      | 26.5063(9)                                                                                     | 26.4701(9)                                                                                     |
| <i>b</i> / Å                                                                                                  | 26.5774(15)                                                                     | 6.7057(2)                                                                                      | 6.7028(2)                                                                                      |
| <i>c</i> / Å                                                                                                  | 6.5224(3)                                                                       | 19.2086(7)                                                                                     | 19.2218(6)                                                                                     |
| $\alpha$ / °                                                                                                  | 90                                                                              | 90                                                                                             | 90                                                                                             |
| $\beta$ / °                                                                                                   | 90                                                                              | 94.165(3)                                                                                      | 94.167(3)                                                                                      |
| $\gamma$ / °                                                                                                  | 90                                                                              | 90                                                                                             | 90                                                                                             |
| <i>V</i> / Å <sup>3</sup>                                                                                     | 2265.33(19)                                                                     | 3405.2(2)                                                                                      | 3401.39(19)                                                                                    |
| <i>Z</i>                                                                                                      | 4                                                                               | 2                                                                                              | 2                                                                                              |
| Flack parameter                                                                                               | /                                                                               | 0.003(2)                                                                                       | -0.014(5)                                                                                      |
| <i>D</i> <sub>calc</sub> / g·cm <sup>-3</sup>                                                                 | 2.859                                                                           | 2.853                                                                                          | 2.856                                                                                          |
| $\mu$ / mm <sup>-1</sup>                                                                                      | 12.915                                                                          | 12.888                                                                                         | 12.902                                                                                         |
| Reflns. collected                                                                                             | 27504                                                                           | 20057                                                                                          | 12748                                                                                          |
| Obsd. reflns. [ <i>I</i> >2 $\sigma$ ( <i>I</i> )]                                                            | 1969                                                                            | 6919                                                                                           | 5867                                                                                           |
| <i>R</i> <sub>int</sub>                                                                                       | 0.0929                                                                          | 0.0248                                                                                         | 0.0342                                                                                         |
| <i>R</i> <sub>1</sub> <sup>a</sup> / <i>wR</i> <sub>2</sub> <sup>b</sup> [ <i>I</i> >2 $\sigma$ ( <i>I</i> )] | 0.0411/0.0696                                                                   | 0.0268/0.0333                                                                                  | 0.0317/0.0634                                                                                  |
| <i>R</i> <sub>1</sub> / <i>wR</i> <sub>2</sub> (all data)                                                     | 0.0896/0.0800                                                                   | 0.0509/0.0521                                                                                  | 0.0406/0.0658                                                                                  |



|                                               |              |              |              |
|-----------------------------------------------|--------------|--------------|--------------|
| GOF                                           | 1.030        | 1.074        | 0.960        |
| $\Delta\rho^c / \text{e}\cdot\text{\AA}^{-3}$ | 1.002/-1.134 | 0.848/-1.210 | 0.775/-1.596 |

<sup>a</sup>  $R_1 = \Sigma||F_o| - |F_c||/\Sigma|F_o|$ . <sup>b</sup>  $wR_2(F^2) = [\Sigma w(F_o^2 - F_c^2)^2/\Sigma wF_o^4]^{1/2}$ . <sup>c</sup> Maximum and minimum residual electron density.

**Table S2** Hydrogen bonds for **1Rac/1R/1S**.

| D—H $\cdots$ A                    | D—H / \AA | H $\cdots$ A / \AA | D $\cdots$ A / \AA | D—H $\cdots$ A / \AA |
|-----------------------------------|-----------|--------------------|--------------------|----------------------|
| <b>1Rac</b>                       |           |                    |                    |                      |
| O1—H1 $\cdots$ O2 <sup>i</sup>    | 0.82      | 1.80               | 2.604(11)          | 166.9                |
| N1—H1A $\cdots$ I2 <sup>iii</sup> | 0.89      | 3.16               | 3.796(6)           | 130.2                |
| N1—H1B $\cdots$ I2 <sup>iv</sup>  | 0.89      | 3.23               | 4.012(8)           | 147.9                |
| C2—H2 $\cdots$ O2 <sup>ii</sup>   | 0.98      | 2.46               | 3.387(11)          | 158.1                |
| C4—H4A $\cdots$ I2 <sup>v</sup>   | 0.97      | 3.12               | 3.901(7)           | 138.5                |
| C4—H4B $\cdots$ I2 <sup>iv</sup>  | 0.97      | 3.10               | 3.968(7)           | 150.0                |
| C5—H5B $\cdots$ I3 <sup>v</sup>   | 0.97      | 3.29               | 3.959(8)           | 127.5                |
| C6—H6A $\cdots$ I2 <sup>iii</sup> | 0.97      | 3.31               | 3.901(8)           | 121.5                |
| C6—H6B $\cdots$ I2 <sup>vi</sup>  | 0.97      | 3.25               | 4.145(9)           | 155.1                |

Symmetry codes: (i)  $-x, -y, -z$ ; (ii)  $-x+1/2, -y, z+1/2$ ; (iii)  $x-1, y, z$ ; (iv)  $x-1, y, z-1$ ; (v)  $x-1/2, y, -z+1/2$ ; (vi)  $x-1/2, y, -z+3/2$ .

**1R**

|                                   |      |      |           |     |
|-----------------------------------|------|------|-----------|-----|
| C2—H2 $\cdots$ I4                 | 0.98 | 3.29 | 4.090(7)  | 140 |
| C5—H5B $\cdots$ I6 <sup>iii</sup> | 0.97 | 3.14 | 4.042(10) | 156 |
| C6—H6A $\cdots$ I6                | 0.97 | 3.15 | 3.970(9)  | 143 |
| C6—H6B $\cdots$ I6 <sup>iii</sup> | 0.97 | 3.31 | 4.178(11) | 150 |
| C8—H8 $\cdots$ O4 <sup>iv</sup>   | 0.98 | 2.59 | 3.551(11) | 168 |

|                               |      |      |           |     |
|-------------------------------|------|------|-----------|-----|
| C10—H10A···I4                 | 0.97 | 3.15 | 3.813(9)  | 127 |
| C10—H10B···I4 <sup>v</sup>    | 0.97 | 3.18 | 4.019(9)  | 146 |
| C11—H11A···I1 <sup>v</sup>    | 0.97 | 3.22 | 3.875(10) | 126 |
| C11—H11B···I1                 | 0.97 | 3.32 | 3.998(10) | 129 |
| C12—H12A···I2 <sup>i</sup>    | 0.97 | 3.29 | 4.167(9)  | 151 |
| C12—H12B···I2 <sup>vi</sup>   | 0.97 | 3.24 | 3.796(9)  | 118 |
| C16—H16A···I6 <sup>vii</sup>  | 0.97 | 3.28 | 3.945(9)  | 127 |
| C16—H16B···I2 <sup>viii</sup> | 0.97 | 3.28 | 4.070(10) | 140 |
| C17—H17B···I6 <sup>vii</sup>  | 0.97 | 3.25 | 3.848(9)  | 122 |
| C17—H17B···I7 <sup>ix</sup>   | 0.97 | 3.26 | 3.951(9)  | 130 |
| C18—H18A···I2 <sup>ix</sup>   | 0.97 | 3.21 | 4.043(9)  | 146 |
| N1—H1B···I4                   | 0.89 | 2.67 | 3.551(8)  | 170 |
| N2—H2A···I1 <sup>v</sup>      | 0.89 | 3.15 | 3.713(7)  | 123 |
| N2—H2A···I2 <sup>vi</sup>     | 0.89 | 2.99 | 3.664(7)  | 134 |
| N2—H2B···I4 <sup>v</sup>      | 0.89 | 3.18 | 3.968(7)  | 149 |
| N2—H2B···O4                   | 0.89 | 2.49 | 3.034(9)  | 120 |
| N3—H3C···I6 <sup>x</sup>      | 0.89 | 2.90 | 3.606(8)  | 137 |
| N3—H3D···I3 <sup>viii</sup>   | 0.89 | 3.08 | 3.907(7)  | 156 |
| O1—H1···O2 <sup>x</sup>       | 0.82 | 1.95 | 2.727(8)  | 158 |
| O3—H3···O6                    | 0.82 | 1.87 | 2.674(9)  | 167 |
| O5—H5···O4                    | 0.82 | 1.81 | 2.623(9)  | 170 |

Symmetry codes: (i)  $-x, y, -z$ ; (iii)  $x, y+1, z$ ; (iv)  $-x-1/2, y+1/2, -z$ ; (v)  $x, y-1, z$ ; (vi)  $-x, y-1, -z$ ; (vii)  $-x-1/2, y-3/2, -z-1$ ; (viii)  $x-1/2, y-3/2, z$ ; (ix)  $x-1/2, y-1/2, z$ ; (x)  $-x-1/2, y-1/2, -z-1$ .

**1S**

|                               |      |      |           |     |
|-------------------------------|------|------|-----------|-----|
| C2—H2···I4                    | 0.98 | 3.31 | 4.107(10) | 140 |
| C5—H5A···I6 <sup>iii</sup>    | 0.97 | 3.13 | 4.043(13) | 157 |
| C6—H6A···I6 <sup>iii</sup>    | 0.97 | 3.30 | 4.170(13) | 150 |
| C6—H6B···I6                   | 0.97 | 3.15 | 3.966(12) | 143 |
| C8—H8···O4 <sup>iv</sup>      | 0.98 | 2.58 | 3.544(14) | 168 |
| C10—H10A···I4 <sup>iii</sup>  | 0.97 | 3.15 | 3.818(12) | 128 |
| C10—H10B···I4                 | 0.97 | 3.17 | 4.014(12) | 147 |
| C11—H11A···I1 <sup>iii</sup>  | 0.97 | 3.30 | 3.987(13) | 129 |
| C11—H11B···I1                 | 0.97 | 3.21 | 3.857(13) | 125 |
| C12—H12A···I2 <sup>i</sup>    | 0.97 | 3.23 | 3.786(12) | 118 |
| C12—H12B···I2 <sup>v</sup>    | 0.97 | 3.30 | 4.167(12) | 150 |
| C16—H16A···I6 <sup>vi</sup>   | 0.97 | 3.29 | 3.946(12) | 126 |
| C16—H16B···I2 <sup>vii</sup>  | 0.97 | 3.28 | 4.083(12) | 141 |
| C17—H17A···I6 <sup>vi</sup>   | 0.97 | 3.24 | 3.841(12) | 122 |
| C17—H17A···I7 <sup>viii</sup> | 0.97 | 3.27 | 3.951(12) | 129 |
| C18—H18B···I2 <sup>viii</sup> | 0.97 | 3.20 | 4.033(11) | 145 |
| N1—H1B···I4                   | 0.89 | 2.68 | 3.558(10) | 168 |
| N2—H2A···I4                   | 0.89 | 3.17 | 3.958(9)  | 149 |
| N2—H2A···O4                   | 0.89 | 2.50 | 3.039(12) | 120 |
| N2—H2B···I1                   | 0.89 | 3.13 | 3.696(10) | 123 |
| N2—H2B···I2 <sup>i</sup>      | 0.89 | 2.99 | 3.665(9)  | 134 |
| N3—H3C···I3 <sup>vii</sup>    | 0.89 | 3.09 | 3.917(9)  | 156 |
| N3—H3D···I6 <sup>ix</sup>     | 0.89 | 2.90 | 3.603(10) | 137 |

|                        |      |      |           |     |
|------------------------|------|------|-----------|-----|
| O1—H1…O2 <sup>vi</sup> | 0.82 | 1.94 | 2.719(11) | 159 |
| O3—H3…O6               | 0.82 | 1.86 | 2.660(13) | 164 |
| O5—H5…O4               | 0.82 | 1.86 | 2.618(11) | 154 |

Symmetry codes: (i)  $-x+1, y, -z+1$ ; (iii)  $x, y-1, z$ ; (iv)  $-x+3/2, y-1/2, -z+1$ ; (v)  $-x+1, y-1, -z+1$ ; (vi)  $-x+3/2, y+1/2, -z+2$ ; (vii)  $x+1/2, y+1/2, z$ ; (viii)  $x+1/2, y-1/2, z$ ; (ix)  $-x+3/2, y-1/2, -z+2$ .

**Table S3** Bond angles and bond lengths for I–Pb inorganic sheets in **1Rac/1R**.

| Bond angles                             | Angle / °   | Bond lengths          | Length / Å |
|-----------------------------------------|-------------|-----------------------|------------|
| <b>1Rac</b>                             |             |                       |            |
| I3—Pb1—I3 <sup>i</sup>                  | 179.76(3)   | Pb1—I3 <sup>i</sup>   | 3.2709(7)  |
| I3 <sup>i</sup> —Pb1—I1                 | 99.687(18)  | Pb1—I3                | 3.2515(7)  |
| I3—Pb1—I1                               | 80.553(18)  | Pb1—I2 <sup>ii</sup>  | 3.1851(6)  |
| I2 <sup>ii</sup> —Pb1—I3 <sup>i</sup>   | 86.389(13)  | Pb1—I2                | 3.1851(6)  |
| I2—Pb1—I3 <sup>i</sup>                  | 86.389(13)  | Pb1—I1                | 3.4194(7)  |
| I2 <sup>ii</sup> —Pb1—I3                | 93.625(13)  | Pb1—I1 <sup>iii</sup> | 3.1684(7)  |
| I2—Pb1—I3                               | 93.624(13)  |                       |            |
| I2 <sup>ii</sup> —Pb1—I2                | 170.30(2)   |                       |            |
| I2 <sup>ii</sup> —Pb1—I1                | 87.420(12)  |                       |            |
| I2—Pb1—I1                               | 87.420(12)  |                       |            |
| I1 <sup>iii</sup> —Pb1—I3               | 86.298(18)  |                       |            |
| I1 <sup>iii</sup> —Pb1—I3 <sup>i</sup>  | 93.462(19)  |                       |            |
| I1 <sup>iii</sup> —Pb1—I2               | 93.446(12)  |                       |            |
| I1 <sup>iii</sup> —Pb1—I2 <sup>ii</sup> | 93.447(12)  |                       |            |
| I1 <sup>iii</sup> —Pb1—I1               | 166.852(12) |                       |            |

Symmetry codes: (i) +x, +y, 1+z; (ii) +x, 1/2-y, +z; (iii) -1/2+x, +y, 3/2-z.

**1R**

|                                        |              |                       |            |
|----------------------------------------|--------------|-----------------------|------------|
| I1—Pb1—I3 <sup>iii</sup>               | 94.988 (19)  | I1—Pb1                | 3.2834(3)  |
| I2—Pb1—I1                              | 86.012 (12)  | I1—Pb1 <sup>i</sup>   | 3.2833(3)  |
| I2—Pb1—I3 <sup>iii</sup>               | 79.714 (16)  | I2—Pb1                | 3.1004(6)  |
| I2—Pb1—I5                              | 96.469 (18)  | I3—Pb1                | 3.0533(7)  |
| I3—Pb1—I1                              | 97.46 (2)    | I3—Pb1 <sup>ii</sup>  | 3.7346(7)  |
| I3—Pb1—I2                              | 88.293 (18)  | I4—Pb1                | 3.2718(6)  |
| I3—Pb1—I4                              | 86.521 (18)  | I5—Pb1                | 3.1893(6)  |
| I3—Pb1—I5                              | 90.41 (2)    | I5—Pb2                | 3.1921(6)  |
| I4—Pb1—I1                              | 88.944 (13)  | I6—Pb2                | 3.1797(6)  |
| I4—Pb1—I3 <sup>iii</sup>               | 106.631 (16) | I7—Pb2                | 3.1815(10) |
| I5—Pb1—I3 <sup>iii</sup>               | 77.85 (2)    | I7—Pb2 <sup>iii</sup> | 3.5242(10) |
| I5—Pb1—I4                              | 89.339 (18)  |                       |            |
| I5—Pb2—I7 <sup>ii</sup>                | 82.96 (2)    |                       |            |
| I5 <sup>iv</sup> —Pb2—I7 <sup>ii</sup> | 82.96 (2)    |                       |            |
| I6 <sup>iv</sup> —Pb2—I5               | 87.445 (16)  |                       |            |
| I6 <sup>iv</sup> —Pb2—I5 <sup>iv</sup> | 94.142 (16)  |                       |            |
| I6—Pb2—I5                              | 94.139 (16)  |                       |            |
| I6—Pb2—I5 <sup>iv</sup>                | 87.445 (16)  |                       |            |
| I6—Pb2—I7 <sup>ii</sup>                | 96.472 (13)  |                       |            |
| I6 <sup>iv</sup> —Pb2—I7 <sup>ii</sup> | 96.472 (13)  |                       |            |
| I6—Pb2—I7                              | 83.528 (13)  |                       |            |
| I6 <sup>iv</sup> —Pb2—I7               | 83.528 (13)  |                       |            |

I7—Pb2—I5 97.04 (2)

I7—Pb2—I5<sup>iv</sup> 97.04 (2)

Symmetry codes: (i)  $-x, y, -z$ ; (ii)  $x, y+1, z$ ; (iii)  $x, y-1, z$ ; (iv)  $-x, y, -z-1$ .

**Table S4** Comparison of working conditions for 2D perovskite polarization photodetectors.

|                                                                                    | $\omega$ | Bias / V | Incident light / nm | Reference |
|------------------------------------------------------------------------------------|----------|----------|---------------------|-----------|
| This work                                                                          | 8        | -0.2     | 405                 | /         |
| (Cl-PMA) <sub>2</sub> CsAgBiBr <sub>7</sub>                                        | 1.3      | 0        | 405                 | 53        |
| (i-AA) <sub>2</sub> CsPb <sub>2</sub> Br <sub>7</sub>                              | 7.2      | 0        | 405                 | 52        |
| (BPA) <sub>2</sub> PbBr <sub>4</sub>                                               | 6.8      | 0        | 377                 | 51        |
| (i-BA) <sub>2</sub> (MA)Pb <sub>2</sub> Cl <sub>7</sub>                            | 2.5      | 0        | 266                 | 50        |
| (BA) <sub>2</sub> (GA)Pb <sub>2</sub> I <sub>7</sub>                               | 2.2      | /        | 520                 | 49        |
| (FPEA) <sub>2</sub> PbI <sub>4</sub>                                               | 2.1      | /        | 520                 | 28        |
| (BA) <sub>2</sub> (FA)Pb <sub>2</sub> I <sub>7</sub>                               | 1.96     | 0        | 637                 | 29        |
| (BA) <sub>2</sub> (DMA)Pb <sub>2</sub> Br <sub>7</sub>                             | 1.43     | /        | 405                 | 48        |
| (i-BA) <sub>2</sub> (DMA)Pb <sub>2</sub> Br <sub>7</sub>                           | 1.4      | /        | 405                 | 47        |
| Cs <sub>2</sub> [C(NH <sub>2</sub> ) <sub>3</sub> ]Pb <sub>2</sub> Br <sub>7</sub> | 1.3      | /        | 405                 | 46        |
| (s-BA) <sub>2</sub> (MA)Pb <sub>2</sub> I <sub>7</sub>                             | 1.16     | /        | 520                 | 45        |
| (IA) <sub>2</sub> (DMA)Pb <sub>2</sub> Br <sub>7</sub>                             | 1.15     | /        | 405                 | 44        |

## Reference

- [1] S. Grimme, J. Antony, S. Ehrlich, H. Krieg, *J. Chem. Phys.* **2010**, 132, 154104.
- [2] V. Wang, N. Xu, J.-C. Liu, G. Tang, W.-T. Geng, *Comput. Phys. Commun.* **2021**, 267, 108033.
- [3] a) G. M. Sheldrick, *Acta Crystallogr C Struct Chem* **2015**, 71, 3; b) O. V. Dolomanov, L. J. Bourhis, R. J. Gildea, J. A. K. Howard, H. Puschmann, *J. Appl. Crystallogr.* **2009**, 42, 339.
